# Supplementary material for: A tiered procedure for assessing the formation of biotransformation products of pharmaceuticals and biocides during activated sludge treatment
Source: Royal Society of Chemistry journal article supplement (doi:10.1039/c0em00238k), 2010-01-01
Supplement: c0em00238k.pdf [file c0em00238k.pdf]

SUPPORTING INFORMATION TO ARTICLE:

**A tiered procedure for assessing the formation of biotransformation products of pharmaceuticals and biocides during activated sludge treatment**

Susanne Kern, Rebekka Baumgartner<sup>1</sup>, Damian E. Helbling, Juliane Hollender, Heinz Singer, Martin Loos, René Schwarzenbach, Kathrin Fenner\*

\* Corresponding author

|                                                                                      |                      |
|--------------------------------------------------------------------------------------|----------------------|
| Content:                                                                             |                      |
| Sampling campaigns and batch experiments<br>Table S 1                                | p. 2<br>p. 2         |
| Investigated compounds<br>Table S 2                                                  | p. 3<br>p. 3         |
| Reference standards and materials                                                    | p. 4                 |
| Analytical details of the qualitative approach<br>Table S 3                          | p. 4<br>p. 4         |
| Analytical details of the quantitative approach<br>Table S 4<br>Table S 5            | p. 5<br>p. 5<br>p. 6 |
| Results of control experiments<br>Figure S 1                                         | p. 6<br>p. 6         |
| Kinetic analysis and CSTR model setup for valsartan and valsartan acid<br>Tables S 6 | p. 7<br>p. 7         |
| MS/MS spectra for bezafibrate and its TPs<br>Figure S 2 and 3                        | p. 8<br>p. 8 f       |
| MS/MS spectra for valsartan and its TPs<br>Figure S 4 - 6                            | p. 10<br>p. 10 ff    |
| References                                                                           | p. 13                |

<sup>1</sup> Kern and Baumgartner contributed equally to publication

## Sampling campaigns and batch experiments

**Table S 1 Overview of sampling campaigns and corresponding batch experiments**

|                                                                     | Campaign 09 (C09)                                                                                                               |                      | Campaign 10 (C10)                                                                              |
|---------------------------------------------------------------------|---------------------------------------------------------------------------------------------------------------------------------|----------------------|------------------------------------------------------------------------------------------------|
| WWTP                                                                | Kloten/Opfikon in Opfikon                                                                                                       | Wüeri in Regensdorf  | Wüeri in Regensdorf                                                                            |
| Population equivalents                                              | 51'000                                                                                                                          | 25'000               |                                                                                                |
| Wastewater per day (dry weather)                                    | 17'500 m <sup>3</sup>                                                                                                           | 5'500 m <sup>3</sup> |                                                                                                |
| Hydraulic retention time of biological treatment step (dry weather) | 8 h                                                                                                                             | 16-18 h              |                                                                                                |
| Sludge retention time                                               | 11 d                                                                                                                            | 16-17 d              |                                                                                                |
| Sampling time                                                       | 2/3 February 2009                                                                                                               |                      | 2/3/4 February 2010                                                                            |
| Approach                                                            | Qualitative                                                                                                                     |                      | Quantitative                                                                                   |
| Batch volume                                                        | 50 mL                                                                                                                           |                      | 70 mL                                                                                          |
| Starting concentration of parent compound                           | 100 µg L <sup>-1</sup>                                                                                                          |                      | 5 µg L <sup>-1</sup>                                                                           |
| Sample volumes withdrawn from batch reactor                         | 2 mL                                                                                                                            |                      | 5 mL                                                                                           |
| Volume transferred to vial                                          | 1 mL                                                                                                                            |                      | 4 mL diluted to 20 mL                                                                          |
| SPE                                                                 | Offline (no SPE for batch samples)                                                                                              |                      | Online                                                                                         |
| Mass spectrometric detection                                        | LTQ-Orbitrap                                                                                                                    |                      | Quantum-ultra                                                                                  |
| Compounds analyzed                                                  | Atenolol, bezafibrate, ketoprofen, metoprolol, ranitidine, valsartan, venlafaxine, carbendazim and target list of potential TPs |                      | Atenolol, metoprolol, atenolol acid, ranitidine, ranitidine-S-oxide, valsartan, valsartan acid |

## Investigated compounds

**Table S 2 Investigated compounds with CAS, structure, supplier, HPLC purity, and usage.**

| Compounds                   | CAS         | structure | Supplier                       | Purity (HPLC, from supplier) | Usage             |
|-----------------------------|-------------|-----------|--------------------------------|------------------------------|-------------------|
| Atenolol                    | 29122-68-7  |           | Sigma-Aldrich                  | ≥98%                         | Beta-blocker      |
| Atenolol acid               | 56392-14-4  |           | Toronto Research Chemicals Inc | 98%                          | Metabolite/TP     |
| Carbendazim                 | 10605-21-7  |           | Ehrenstorfer                   | 99 %                         | Fungicide         |
| 2-Amino-benzimidazole       | 934-32-7    |           | Ehrenstorfer                   | 99%                          | TP                |
| Venlafaxine                 | 93413-69-5  |           | Siegfried                      | 100%                         | Anti-depressant   |
| N-Desmethyl-venlafaxine     | 149289-30-5 |           | Toronto Research Chemicals Inc | 98%                          | TP                |
| O-Desmethyl-venlafaxine     | 93413-62-8  |           | Toronto Research Chemicals Inc | 98%                          | TP                |
| O,N-Didesmethyl-venlafaxine | 135308-74-6 |           | Toronto Research Chemicals Inc | 98%                          | TP                |
| Bezafibrate                 | 41859-67-0  |           | Sigma-Aldrich                  | ≥98%                         | Anti-lipemic      |
| Amino-bezafibrate           | 55458-78-1  |           | n.a.                           | n.a.                         | TP                |
| Dihydroxy-amino-bezafibrate | n.a.        |           | n.a.                           | n.a.                         | TP                |
| Ketoprofen                  | 22071-15-4  |           | Sigma-Aldrich                  | ≥98%                         | Anti-inflammatory |
| Metoprolol                  | 37350-58-6  |           | Sigma-Aldrich                  | 99%                          | Beta-blocker      |
| Ranitidine                  | 66357-35-5  |           | Sigma-Aldrich                  | >99%                         | Antagonist        |
| Ranitidine-S-oxide          | 73851-70-4  |           | Toronto Research Chemicals Inc | 95%                          | TP                |
| Ranitidine-N-oxide          | 73857-20-2  |           | Toronto Research Chemicals Inc | 95%                          | TP                |
| Valsartan                   | 137862-53-4 |           | Toronto Research Chemicals Inc | 98%                          | Anti-hypertensive |
| Valsartan acid              | 164265-78-5 |           | Novartis                       | >99%                         | TP                |
| Dealkylated valsartan       | 914465-68-2 |           | n.a.                           | n.a.                         | TP                |
| Amino-valsartan             | 147225-68-1 |           | n.a.                           | n.a.                         | TP                |

## Reference standards and materials

The internal reference standards atenolol-d7, atenolol acid-d5, bezafibrate-d4, metoprolol-d7, N-desmethylvenlafaxine-d3, O-desmethylvenlafaxine-d6, ranitidine-d6, valsartan-d3, and venlafaxine-d6 were purchased from Toronto Research Chemicals Inc (Canada). Carbendazim-d4 was purchased from Ehrenstorfer (Germany), valsartan acid-d4 was cordially provided by Novartis International AG (Switzerland). All internal standards had purities  $\geq 98\%$ .

Methanol and water (HPLC grade) were obtained from Acros Organics (Belgium). Ethanol p.a., ammonium acetate,  $\text{NH}_3$  (25%), and formic acid 98-100% p.a. were purchased from Merck.

## Analytical details of the qualitative approach

**Table S 3 Analytes for LTQ-Orbitrap measurement.**

| Analyte                     | Retention time (X-Bridge C18) | Exact mass $[\text{M}+\text{H}]^+$ | Fragments for comparison to reference standard                                                                                                                                                               | HCD (-) |
|-----------------------------|-------------------------------|------------------------------------|--------------------------------------------------------------------------------------------------------------------------------------------------------------------------------------------------------------|---------|
| Atenolol                    | 2.4 min                       | 267.1703                           | 190.0863 ( $\text{C}_{11}\text{H}_{12}\text{O}_2\text{N}_1$ ), 225.1234 ( $\text{C}_{11}\text{H}_{17}\text{O}_3\text{N}_2$ ), 145.0644 ( $\text{C}_{10}\text{H}_9\text{O}_1$ )                               | 45      |
| Atenolol acid               | 3.9 min                       | 268.1543                           | 191.0707 ( $\text{C}_{11}\text{H}_{11}\text{O}_3$ ), 145.0647 ( $\text{C}_{10}\text{H}_9\text{O}_1$ ), 226.1077 ( $\text{C}_{11}\text{H}_{16}\text{O}_4\text{N}_1$ )                                         | 45      |
| Carbendazim                 | 3.7 min                       | 192.0768                           | 160.0506 ( $\text{C}_8\text{H}_6\text{O}_1\text{N}_3$ ), 132.0557 ( $\text{C}_7\text{H}_6\text{N}_3$ )                                                                                                       | 60      |
| 2-Aminobenzimidazole        | 2.7 min                       | 134.0713                           | 92.0491 ( $\text{C}_6\text{H}_6\text{N}_1$ ), 107.0600 ( $\text{C}_6\text{H}_7\text{N}_2$ )                                                                                                                  | 80      |
| Venlafaxine                 | 6.4 min                       | 278.2115                           | 260.2009 ( $\text{C}_{17}\text{H}_{26}\text{O}_1\text{N}_1$ ), 58.0644 ( $\text{C}_{12}\text{H}_8\text{N}_1$ ), 215.1429 ( $\text{C}_{15}\text{H}_{19}\text{O}_1$ )                                          | 40      |
| N-Desmethyl-venlafaxine     | 6.5 min                       | 264.1958                           | 215.1430 ( $\text{C}_{15}\text{H}_{19}\text{O}_1$ ), 121.0644 ( $\text{C}_8\text{H}_9\text{O}_1$ ), 147.0801 ( $\text{C}_{10}\text{H}_{11}\text{O}_1$ )                                                      | 45      |
| O-Desmethyl-venlafaxine     | 5.1 min                       | 264.1958                           | 246.1852 ( $\text{C}_{16}\text{H}_{24}\text{O}_1\text{N}_1$ ), 58.0644 ( $\text{C}_3\text{H}_8\text{N}_1$ ), 107.0486 ( $\text{C}_7\text{H}_7\text{O}_1$ )                                                   | 45      |
| O,N-Didesmethyl-venlafaxine | 4.7 min                       | 250.1802                           | 201.1273 ( $\text{C}_{14}\text{H}_{17}\text{O}_1$ ), 133.0644 ( $\text{C}_9\text{H}_9\text{O}_1$ ), 232.1696 ( $\text{C}_{15}\text{H}_{22}\text{O}_1\text{N}_1$ )                                            | 45      |
| Bezafibrate                 | 10.6 min                      | 362.1154                           | 138.9941 ( $\text{C}_7\text{H}_4\text{O}_1\text{Cl}_1$ ), 316.1102 ( $\text{C}_{18}\text{H}_{19}\text{O}_2\text{N}_1\text{Cl}_1$ ), 276.0787 ( $\text{C}_{15}\text{H}_{15}\text{O}_2\text{N}_1\text{Cl}_1$ ) | 35      |
| Amino-bezafibrate           | 4.4 min                       | 224.1276                           | no reference standard                                                                                                                                                                                        | 50      |
| Dihydroxy-amino-bezafibrate | 6.7 min                       | 256.1174                           | no reference standard                                                                                                                                                                                        | 15      |
| Ketoprofen                  | 9.7 min                       | 255.1016                           | 209.0963 ( $\text{C}_{15}\text{H}_{13}\text{O}_1$ ), 105.0331 ( $\text{C}_7\text{H}_5\text{O}_1$ ), 177.0547 ( $\text{H}_{19}\text{H}_9\text{O}_3$ )                                                         | 15      |
| Metoprolol                  | 5.2 min                       | 268.1907                           | 191.1068 ( $\text{C}_{12}\text{H}_{15}\text{O}_2$ ), 159.0803 ( $\text{C}_{11}\text{H}_{11}\text{O}_1$ ), 116.1067 ( $\text{C}_6\text{H}_{14}\text{O}_1\text{N}_1$ )                                         | 45      |
| Ranitidine                  | 2.5 min                       | 315.1485                           | 176.0489 ( $\text{C}_5\text{H}_{10}\text{O}_2\text{N}_3\text{S}_1$ ), 130.0557 ( $\text{C}_5\text{H}_{10}\text{N}_2\text{S}_1$ ), 224.0979 ( $\text{C}_{11}\text{H}_{16}\text{O}_1\text{N}_2\text{S}_1$ )    | 35      |
| Ranitidine-S-oxide          | 1.0 min                       | 331.1435                           | 138.0911 ( $\text{C}_8\text{H}_{12}\text{O}_1\text{N}_1$ ), 110.0960 ( $\text{C}_7\text{H}_{12}\text{N}_1$ ), 94.0409 ( $\text{C}_6\text{H}_6\text{O}_1$ )                                                   | 35      |
| Ranitidine-N-oxide          | 2.6 min                       | 331.1435                           | 176.0487 ( $\text{C}_5\text{H}_{10}\text{O}_2\text{N}_3\text{S}_1$ ), 130.0556 ( $\text{C}_5\text{H}_{10}\text{N}_2\text{S}_1$ ), 224.0977 ( $\text{C}_{11}\text{H}_{16}\text{O}_1\text{N}_2\text{S}_1$ )    | 35      |
| Valsartan                   | 11.1 min                      | 436.2343                           | 207.0913 ( $\text{C}_{14}\text{H}_{11}\text{N}_2$ ), 235.0975 ( $\text{C}_{14}\text{H}_{11}\text{N}_4$ ), 291.1490 ( $\text{C}_{19}\text{H}_{19}\text{O}_1\text{N}_2$ )                                      | 30      |
| Valsartan acid              | 6.8 min                       | 267.0877                           | 206.0603 ( $\text{C}_{14}\text{H}_8\text{O}_1\text{N}_1$ ), 221.0716 ( $\text{C}_{14}\text{H}_9\text{O}_1\text{N}_2$ ), 178.0653 ( $\text{C}_{13}\text{H}_8\text{N}_1$ )                                     | 45      |
| Dealkylated valsartan       | 8.3 min                       | 336.1819                           | no reference standard                                                                                                                                                                                        | 35      |
| Amino-valsartan             | 4.6 min                       | 252.1244                           | no reference standard                                                                                                                                                                                        | 45      |

## Analytical details of the quantitative approach

For sample injection and buffer addition, a tri-directional autosampler (HTC PAL, CTC Analytics, Switzerland) with a 100- $\mu$ L side-port syringe (80-mm needle, Hamilton, Switzerland) was connected with a large volume dispenser module (10-mL dispenser syringe with 10-mL loop, CTC Analytics) and four sample trays with 128 positions for 20 mL vials (GB Analytik, Switzerland). Sample enrichment was achieved with a 20-mL sample loop (custom product, BGB Analytik, Switzerland) on a manually filled SPE cartridge 20 mm x 2.1 mm I.D., 25  $\mu$ m particle size (analogue to cartridges for offline SPE with 9.1 mg Oasis and 9.8 mg of Strata XCW, Strata XAW and Isolute ENV+ in a mixing ratio of 1:1:1.5). The HPLC pump system consisted of a binary pump for sample loading, a quaternary low pressure mixing gradient pump, an isocratic pump (all Rheos 2000, Flux Instruments, Switzerland) and a column oven (Jones, Omnilab, Switzerland).

For the first method, the gradient was run from 90% water (5mM  $\text{NH}_4\text{Ac}$ , pH 5) and 10% methanol (0.5% 25%- $\text{NH}_3$ ) to 95% methanol and 5% water within 23 minutes. The gradient of the second method was run from 90% water (+0.1% formic acid) and 10% methanol to 95% methanol and 5% water within 30 minutes. Retention times for both methods are given in Table S4, as well as the assigned internal standards, transition quantifiers, identifiers and collision energy for the quantitatively measured analytes.

For the batch experiment, metoprolol, atenolol, atenolol acid, valsartan and valsartan acid were analyzed with the first method (basic conditions) due to better selectivity and sensitivity for the two transformation products, whereas ranitidine and ranitidine-S-oxide were analyzed with the second method (neutral/acidic conditions). The LOQ for all analytes in the batch was between 5-50 ng/L (except for atenolol acid LOQ 100 ng/L).

For influent, secondary effluent, final effluent, and surface water, all analytes were analyzed with both methods, but the second method (neutral/acidic conditions) was taken for comparison to model predictions. The LOQ was <10 ng/L for all matrices and analytes except for atenolol acid (LOQ 30-60 ng/L) and valsartan acid (LOQ 30-40 ng/L). The spike recoveries of influent, secondary effluent, final effluent, and surface water were all between 90-110% except for ranitidine-S-oxide which had no isotopically labelled internal standard (spike recovery 70-80% for all four different matrices).

**Table S 4 LC-MS/MS data of analytes for the two methods: Retention time (first method with neutral elution and acidic chromatography: Waters T3 Atlantis column, second method with basic elution and chromatography: Nucleodur C18 Gravity column), identifier and quantifier ions, and collision energy on triple quadrupole instrument.**

| Analyte            | Internal standard | Retention time (Atlantis) | Retention time (Nucleodur) | Transition quantifier | Transition identifier | Collision energy |
|--------------------|-------------------|---------------------------|----------------------------|-----------------------|-----------------------|------------------|
| Atenolol           | Atenolol-d7       | 14.4                      | 7.8                        | 267.2→190.0           | 267.2→225.1           | 18/16            |
| Atenolol acid      | Atenolol acid-d5  | 14.4                      | 6.9                        | 268.2→145.0           | 268.2→191.1           | 24/17            |
| Metoprolol         | Metoprolol-d7     | 19.4                      | 18.0                       | 268.2→159.0           | 268.2→133.0           | 17/21            |
| Ranitidine         | Ranitidine-d6     | 14.6                      | 9.5                        | 315.2→176.0           | 315.2→130.0           | 17/26            |
| Ranitidine-S-oxide | Atenolol-d7       | 12.3                      | 9.0                        | 331.1→138.1           | 331.1→110.1           | 16/26            |
| Valsartan          | Valsartan-d3      | 26.1                      | 14.2                       | 436.2→207.0           | 436.2→291.1           | 27/18            |
| Valsartan acid     | Valsartan acid-d4 | 21.9                      | 9.3                        | 267.0→206.0           | 267.0→151.0           | 18/40            |

Ionization source parameters for ESI are given in Table S 5:

**Table S 5 ESI source parameters**

| Parameters            | Unit      | ESI+ | ESI- |
|-----------------------|-----------|------|------|
| Spray voltage         | V         | 3800 | 3000 |
| Sheath gas            | arbitrary | 50   | 50   |
| Auxiliary gas         | arbitrary | 10   | 10   |
| Capillary temperature | °C        | 350  | 350  |

Data were analyzed with Xcalibur (Thermo Scientific, USA) in the QuanBrowser.

## Results of control experiments

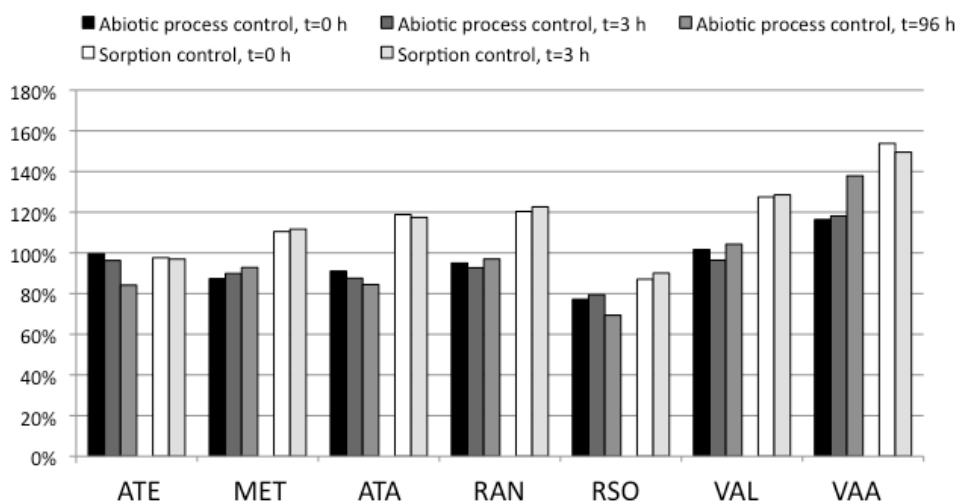

**Figure S 1 Results of effluent and autoclaved control experiments for each of the seven quantitatively analyzed compounds. Sorption equilibrium is assumed to be reached within the first three hours. ATE = Atenolol, MET = Metoprolol, ATA = Atenolol acid, RAN = Ranitidine, RSO = Ranitidine-S-oxide, VAL = Valsartan, VAA = Valsartan acid.**

## Kinetic analysis and CSTR model setup for valsartan and valsartan acid

Eq. 2b given in the main paper is not suited to estimate the rate constants from the valsartan batch because valsartan acid is a third generation TP and hence formation of two intermediate TPs has to be accounted for in the rate equations. Eq. S1 gives the analytical solution for the concentration of valsartan acid as a function of time, assuming that the three TPs of valsartan form a sequence, i.e., valsartan  $\rightarrow$  dealkylated valsartan (TP1)  $\rightarrow$  amino-valsartan (TP2)  $\rightarrow$  valsartan acid (TP3).

$$c^{TP3} = -(\exp(-a*t - b*t - c*t - d*t) * (-a^3*b^2*c^2*\exp(a*t + b*t + c*t)*FF1*FF2*FF3 + a^2*b^3*c*\exp(a*t + b*t + c*t)*FF1*FF2*FF3 + a^3*b*c^2*\exp(a*t + b*t + c*t)*FF1*FF2*FF3 - a*b^3*c^2*\exp(a*t + b*t + c*t)*FF1*FF2*FF3 - a^2*b*c^3*\exp(a*t + b*t + c*t)*FF1*FF2*FF3 + a*b^2*c^3*\exp(a*t + b*t + c*t)*FF1*FF2*FF3 + a^3*b^2*c*\exp(a*t + b*t + d*t)*FF1*FF2*FF3 - a^2*b^3*c*\exp(a*t + b*t + d*t)*FF1*FF2*FF3 - a^3*b*c*d*\exp(a*t + b*t + d*t)*FF1*FF2*FF3 + a*b^3*c*d*\exp(a*t + b*t + d*t)*FF1*FF2*FF3 + a^2*b*c*d^2*\exp(a*t + b*t + d*t)*FF1*FF2*FF3 - a*b^2*c*d^2*\exp(a*t + b*t + d*t)*FF1*FF2*FF3 - a^3*b*c^2*\exp(a*t + c*t + d*t)*FF1*FF2*FF3 + a^2*b*c^3*\exp(a*t + c*t + d*t)*FF1*FF2*FF3 + a^3*b*c*d*\exp(a*t + c*t + d*t)*FF1*FF2*FF3 - a*b*c^3*d*\exp(a*t + c*t + d*t)*FF1*FF2*FF3 - a^2*b*c*d^2*\exp(a*t + c*t + d*t)*FF1*FF2*FF3 + a*b*c^2*d^2*\exp(a*t + c*t + d*t)*FF1*FF2*FF3 + a*b^3*c^2*\exp(b*t + c*t + d*t)*FF1*FF2*FF3 - a*b^2*c^3*\exp(b*t + c*t + d*t)*FF1*FF2*FF3 - a*b^3*c*d*\exp(b*t + c*t + d*t)*FF1*FF2*FF3 + a*b*c^3*d*\exp(b*t + c*t + d*t)*FF1*FF2*FF3 + a*b^2*c*d^2*\exp(b*t + c*t + d*t)*FF1*FF2*FF3 - a*b*c^2*d^2*\exp(b*t + c*t + d*t)*FF1*FF2*FF3) * P0) / ((-a + b)*(b - c)*(-a + c)*(a - d)*(b - d)*(c - d))$$

eq. S1

with  $a = k_{deg}^{PC}$ ,  $b = k_{deg}^{TP1}$ ,  $c = k_{deg}^{TP2}$ ,  $d = k_{deg}^{TP3}$ , FF1 = fraction of TP1 forming out of PC, FF2 = fraction of TP2 forming out of TP1, FF3 = fraction of TP3 forming out of TP2. To fit eq. S1 to the data, FF1 and FF2 were assumed to be 1, and only FF3 was fit to the data. This assumption was considered justified since no other relevant TPs had been observed to be formed in parallel, and based on the mechanisms of transformation, which suggest quantitative conversion, at least for the amide hydrolysis from TP1 to TP2<sup>1</sup>. Also,  $k_{deg}^{TP1}$  and  $k_{deg}^{TP2}$  were assumed to differ from  $k_{deg}^{PC}$  by fixed factors, which were derived from fitting the qualitative data given in Figure 2 (main paper) for WWTP Wüeri. This is acceptable since the shape of the TP curves is determined by the relative rate constants of precursor and TP and is independent of the absolute heights of the curves.

To calculate the expected effluent concentrations of valsartan acid with the mass balance model for WWTP Wüeri, the model was supplemented with two more sets of differential equations for TP2 and TP3, where the precursor, PC, in eqs. 4a/b (main paper) was replaced with TP1 and TP2, respectively, and the product, TP, was replaced with TP2 and TP3 respectively.

**Table S 6 WWTP-specific parameters for mass balance model**

| Parameters                     | Symbol     | Unit                | Value    |
|--------------------------------|------------|---------------------|----------|
| Discharge                      | $Q$        | m <sup>3</sup> /d   | 2230±870 |
| Internal recirculation         | $IR$       | m <sup>3</sup> /d   | 1985±345 |
| Return sludge                  | $RS$       | m <sup>3</sup> /d   | 1680±190 |
| Suspended solids concentration | $X_{ss}$   | kg/m <sup>3</sup>   | 3.0±0.1  |
| Volume reactors 1+2            | $V[1...2]$ | m <sup>3</sup> each | 312      |
| Volume reactor 3               | $V[3]$     | m <sup>3</sup>      | 260      |
| Volume reactors 4–6            | $V[4...6]$ | m <sup>3</sup> each | 400      |

## MS/MS spectra for bezafibrate and its TPs

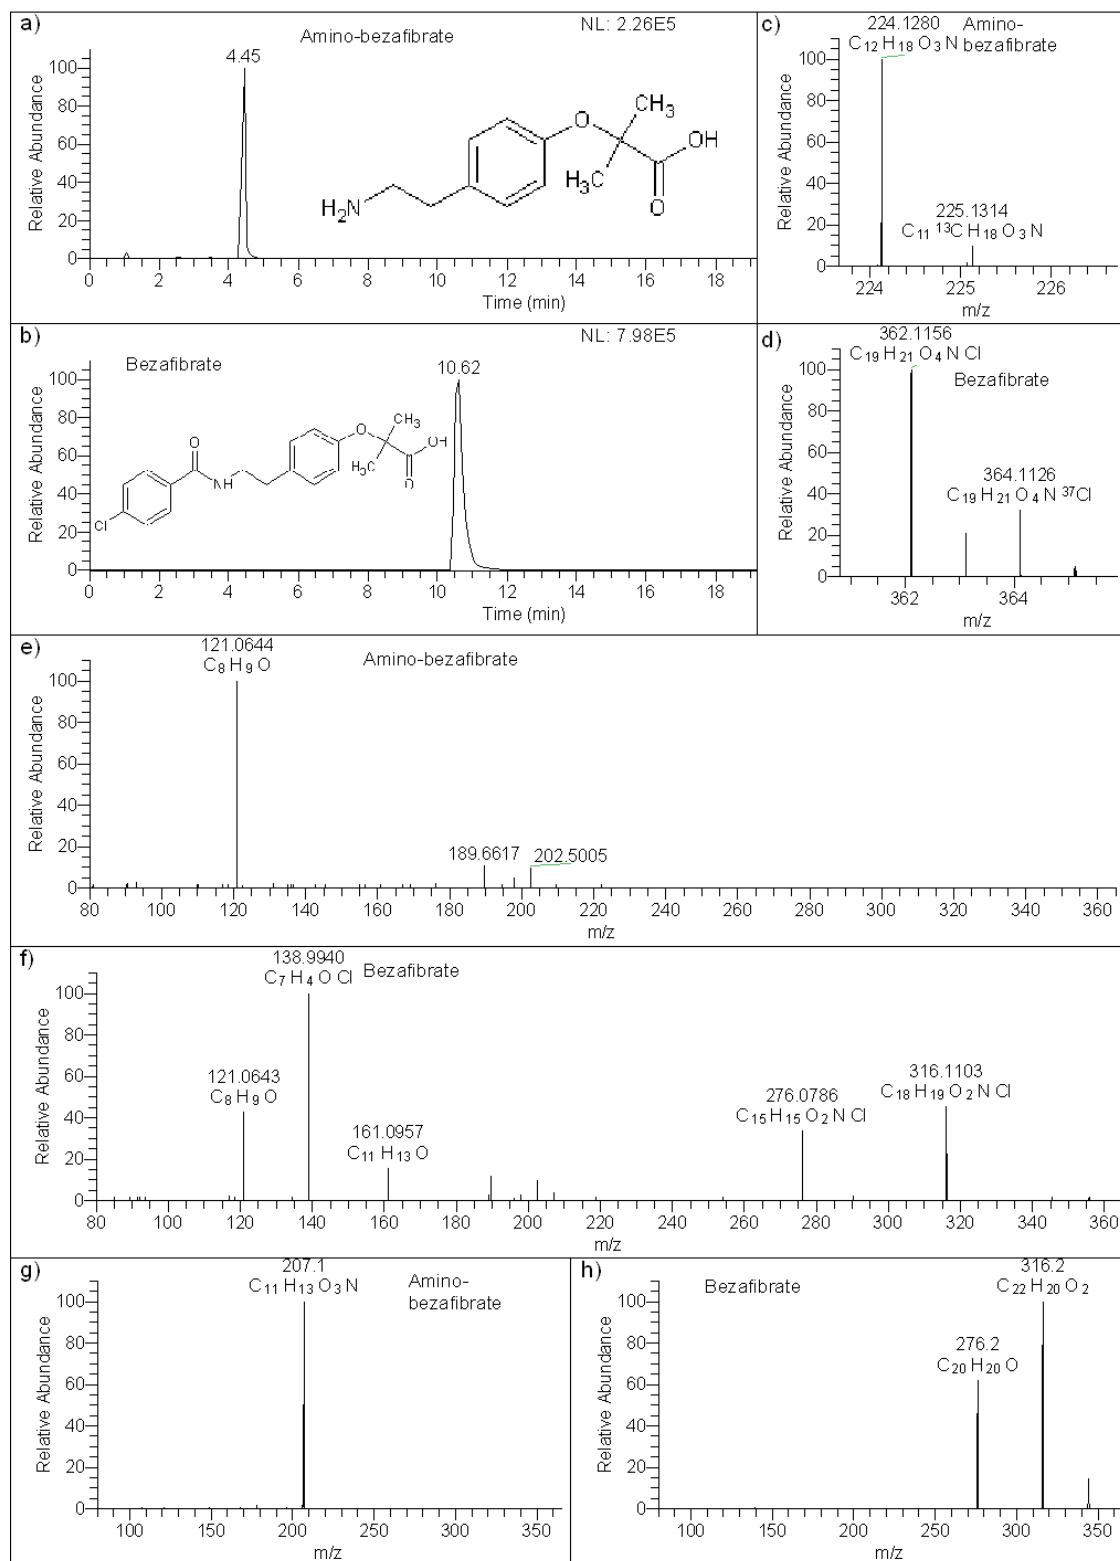

**Figure S 2** Structure of the TP amino-bezafibrate ( $[M+H]^+$  224.1276) and its parent compound bezafibrate ( $[M+H]^+$  362.1154) and corresponding chromatograms (a and b), HR-MS spectra of the molecular ions, including isotopic patterns (c and d), the HR-MS/MS spectra from HCD (e and f), and MS/MS spectra from CID (g and h). All spectra are shown for the Wüeri 09 batch after 3 hours.



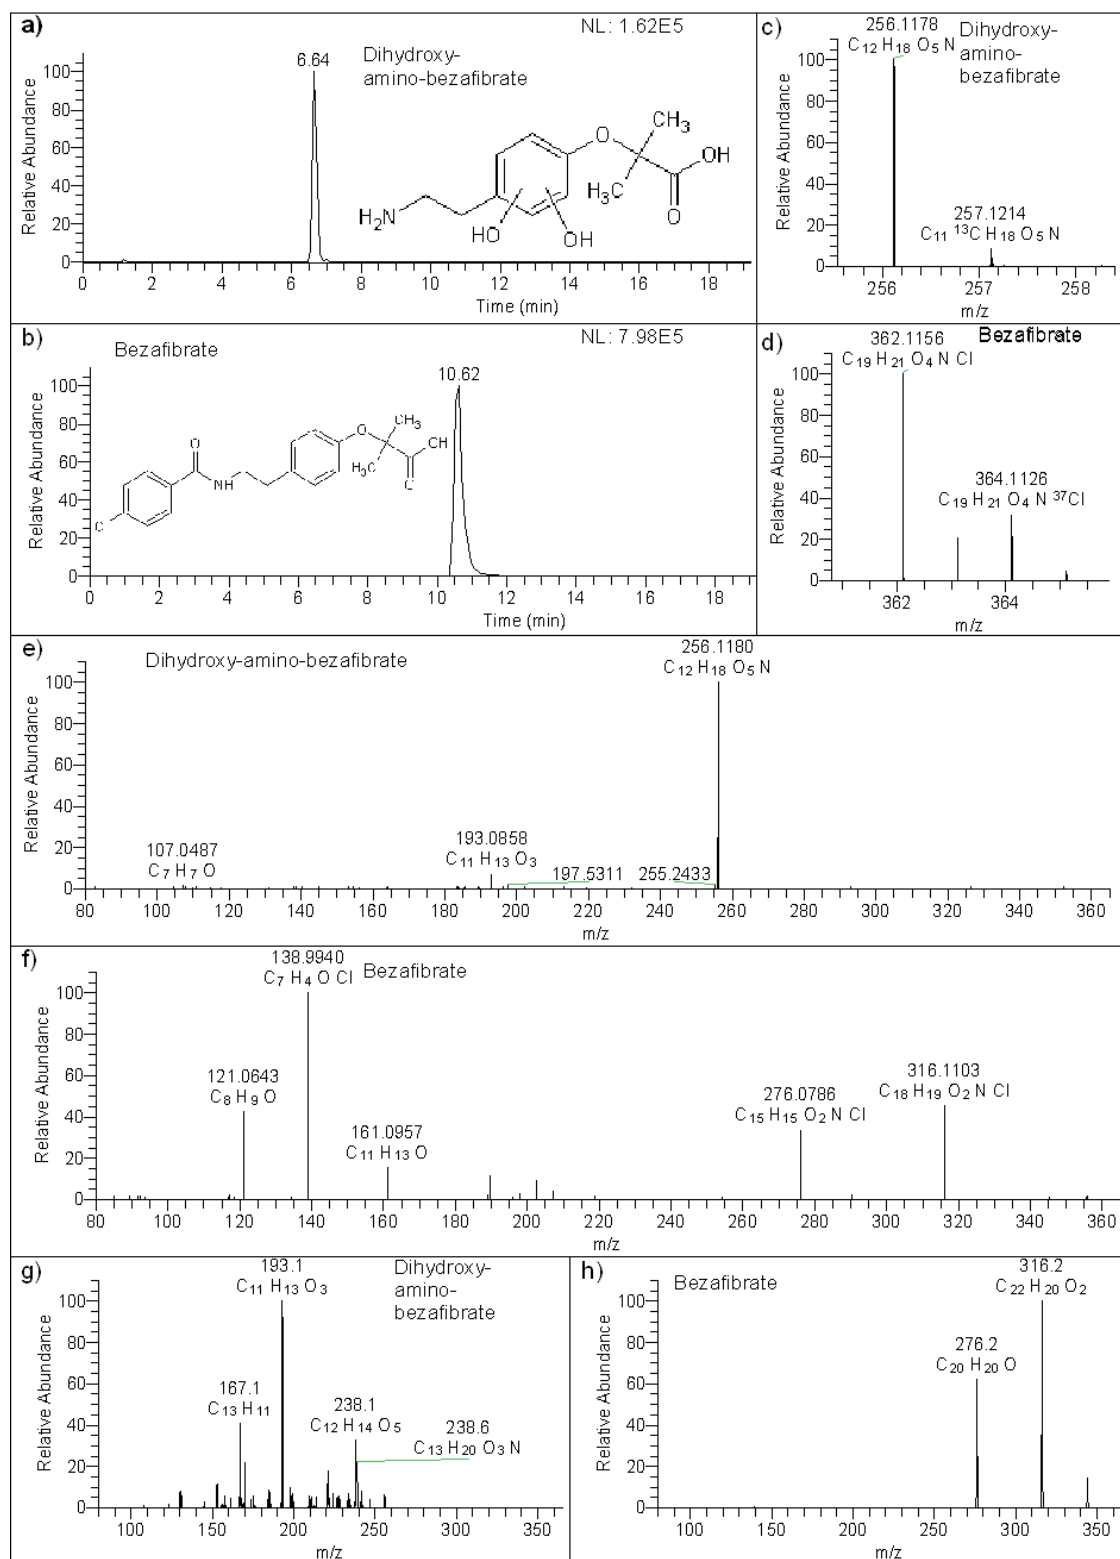

**Figure S 3** Structure of the TP dihydroxy-amino-bezafibrate ( $[M+H]^+$  256.1174) and its parent compound bezafibrate ( $[M+H]^+$  362.1154) and corresponding chromatograms (a and b), HR-MS spectra of the molecular ions, including isotopic patterns (c and d), the HR-MS/MS spectra from HCD (e and f), and MS/MS spectra from CID (g and h). All spectra are shown for the Wüeri 09 batch after 48 hours.

## MS/MS spectra for valsartan and its TPs

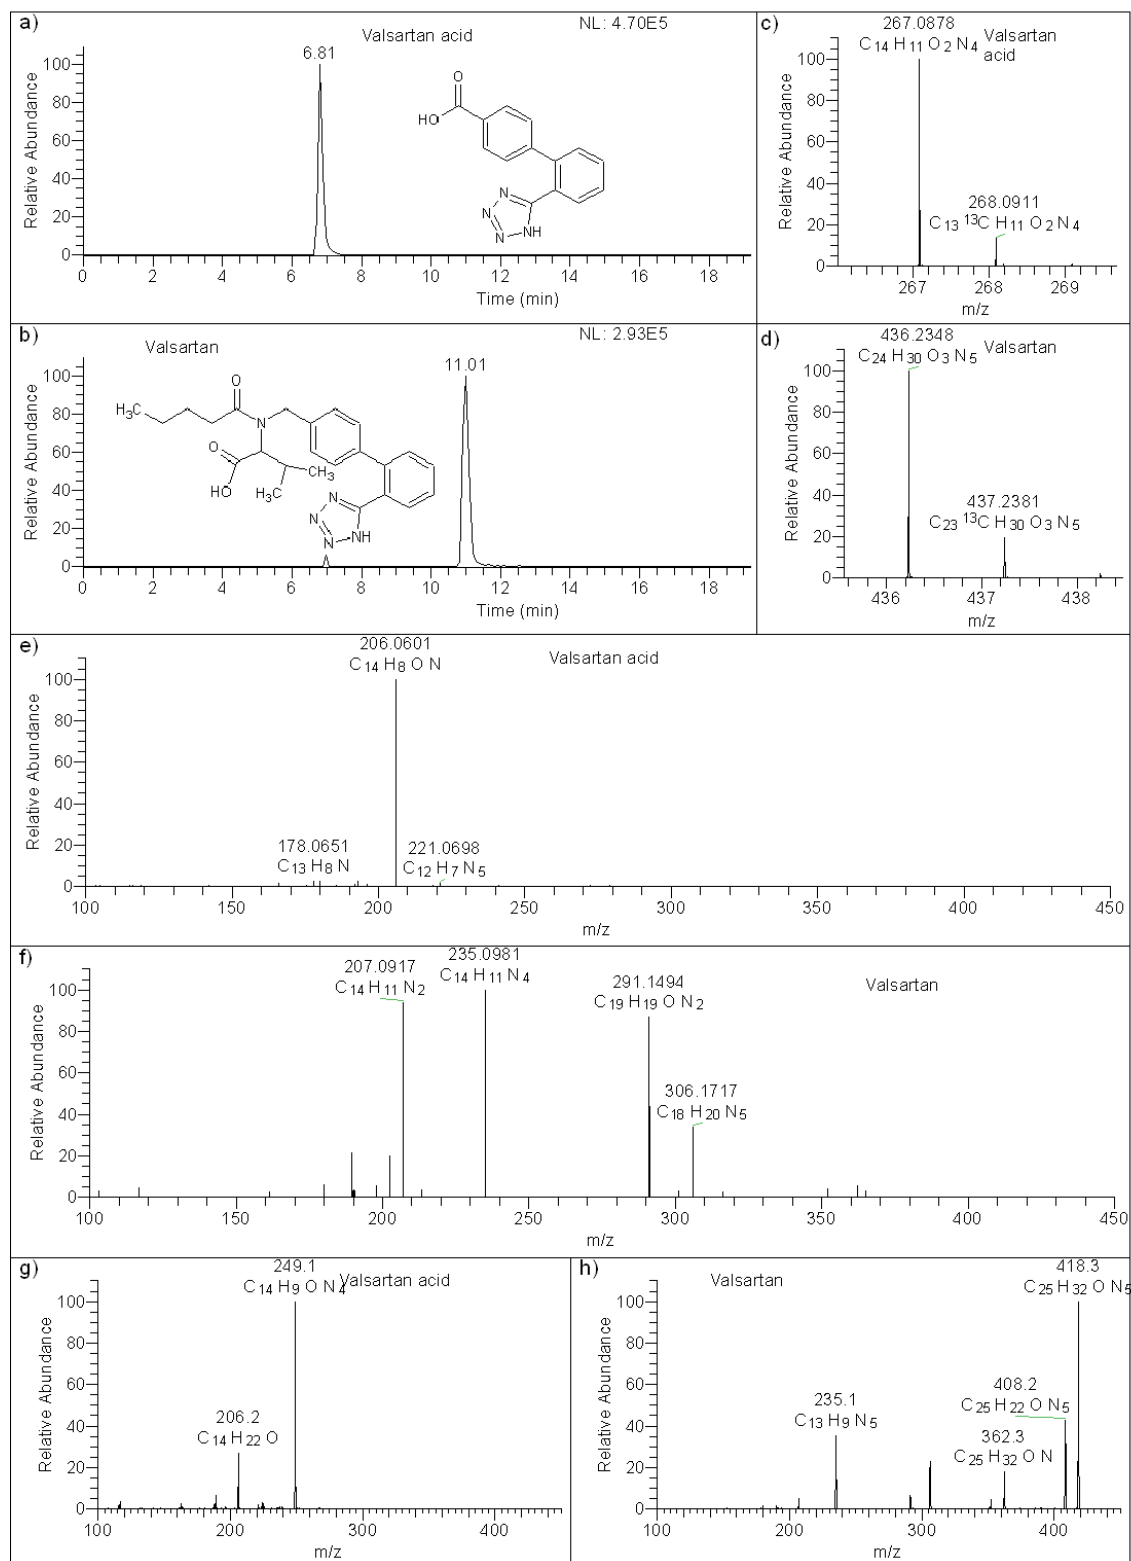

**Figure S 4** Structure of the TP valsartan acid ( $[M+H]^+$  267.0877) and its parent compound valsartan ( $[M+H]^+$  436.2343) and corresponding chromatograms (a and b), HR-MS spectra of the molecular ions, including isotopic patterns (c and d), the HR-MS/MS spectra from HCD (e and f), and MS/MS spectra from CID (g and h). All spectra are shown for the Wüeri 09 batch after 10 hours.

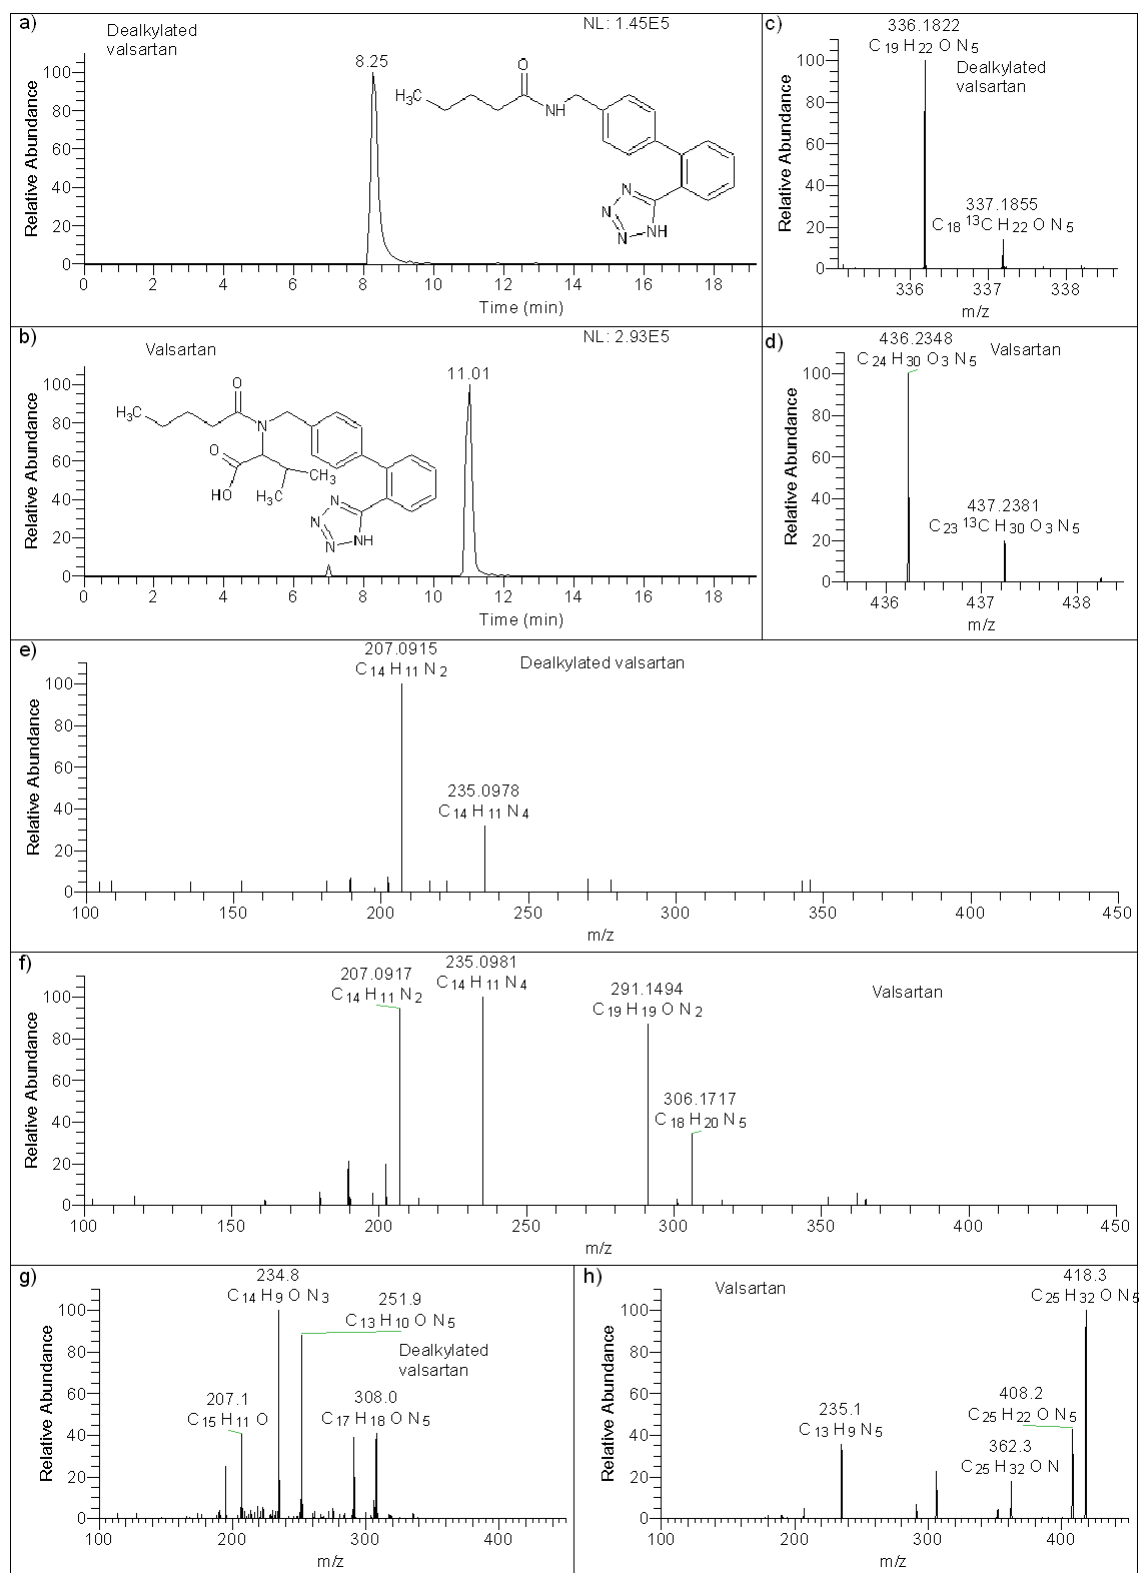

**Figure S 5** Structure of the TP dealkylated valsartan ( $[M+H]^+$  336.1819) and its parent compound valsartan ( $[M+H]^+$  436.2343) and corresponding chromatograms (a and b), HR-MS spectra of the molecular ions, including isotopic patterns (c and d), the HR-MS/MS spectra from HCD (e and f), and MS/MS spectra from CID (g and h). All spectra are shown for the Wüeri 09 batch after 10 hours.

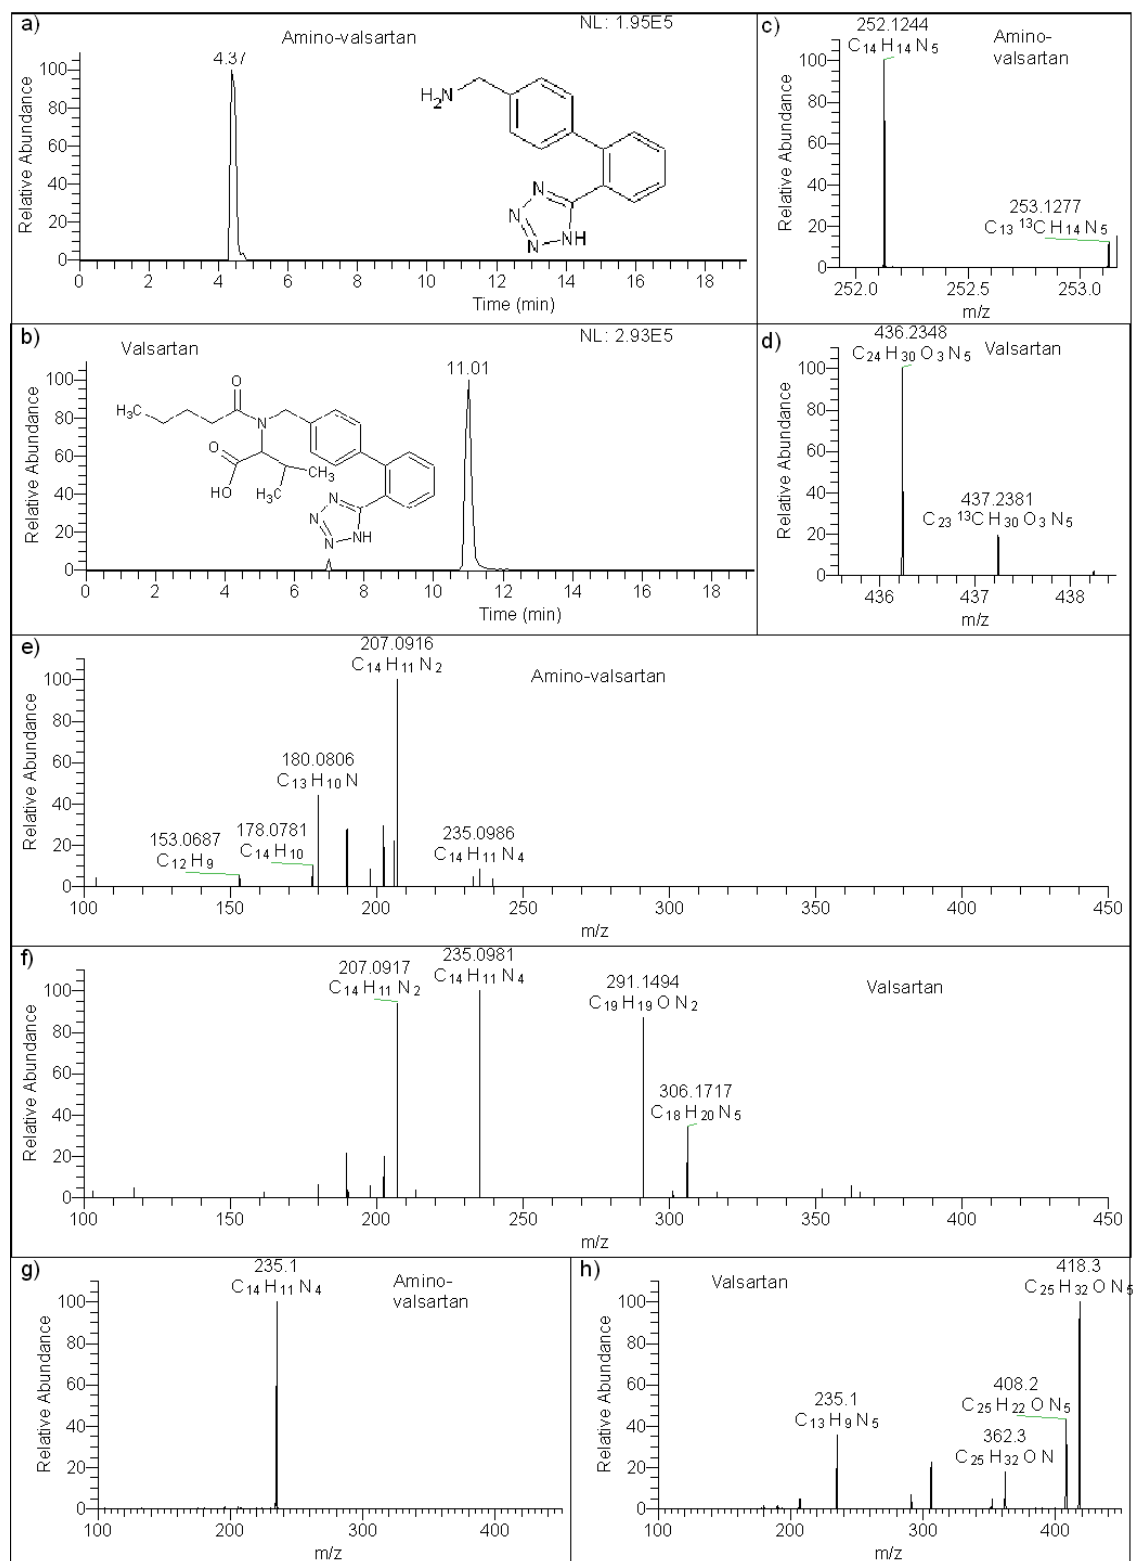

**Figure S 6** Structure of the TP amino-valsartan ( $[M+H]^+$  252.1244) and its parent compound valsartan ( $[M+H]^+$  436.2343) and corresponding chromatograms (a and b), HR-MS spectra of the molecular ions, including isotopic patterns (c and d), the HR-MS/MS spectra from HCD (e and f), and MS/MS spectra from CID (g and h). All spectra are shown for the Wüeri 09 batch after 10 hours.

## References

- (1) Helbling, D. E.; Hollender, J.; Kohler, H.-P. E.; Fenner, K. A structure-based interpretation of biotransformation pathways of amide-containing compounds during wastewater treatment. **2010**, submitted to *Environ. Sci. Technol.*
- (2) Stoob, K.; Singer, H. P.; Goetz, C. W.; Ruff, M.; Mueller, S. R. Fully automated online solid phase extraction coupled directly to liquid chromatography-tandem mass spectrometry - quantification of sulfonamide antibiotics, neutral and acidic pesticides at low concentrations in surface waters. *J. Chromatogr. A* **2005**, *1097*, 138-147.
